# Supplementary material for: The Value of Information in Portfolio Problems with Dependent Projects
Source: Atypon-hosted journal article supplement (doi:10.1287/deca.2013.0277), 2013-12-01
Supplement: deca.2013.0277-sm.pdf [file deca.2013.0277-sm.pdf]

## Appendix

### Proof of Theorem 1:

The multivariate Gaussian probability density function for random vector  $\mathbf{X} = (X_1, \dots, X_N)^T$  is:

$$p(\mathbf{x}) = \frac{1}{(2\pi)^{N/2}} \frac{1}{|\boldsymbol{\Sigma}|^{1/2}} \exp\left(-\frac{1}{2}(\mathbf{x} - \boldsymbol{\mu})^T \boldsymbol{\Sigma}^{-1}(\mathbf{x} - \boldsymbol{\mu})\right). \text{ The marginal distribution of } X_i \text{ is Gaussian with}$$

mean  $\mu_i$  and variance equal to the  $i^{\text{th}}$  diagonal term of  $\boldsymbol{\Sigma}$ , denoted  $\sigma_i^2$ .

The decision maker is risk-neutral and therefore s/he maximizes the total expected profits. A priori, the decision maker chooses the projects with positive expected value. If we denote the set of a priori profitable projects as  $\mathbb{P}$ , then the prior value  $PV = \sum_i \max(0, \mu_i) = \sum_{i \in \mathbb{P}} \mu_i$ .

Suppose there is an information source  $\mathbf{Y}$  about the projects;  $\mathbf{Y} = \mathbf{X} + \mathbf{E}$ ,  $\mathbf{E} \sim N(\mathbf{0}, \mathbf{T})$ . Let  $\mathbb{K}$  denote a subset of the projects. If the decision maker is able to observe information  $\mathbf{Y}_{\mathbb{K}}$  about the subset (for free), then the value with this information is:

$$\int \sum_{i=1}^N \left[ \max(E(X_i | \mathbf{y}_{\mathbb{K}}), 0) \right] p(\mathbf{y}_{\mathbb{K}}) d\mathbf{y}_{\mathbb{K}} = \sum_{i=1}^N \left[ \int \max(E(X_i | \mathbf{y}_{\mathbb{K}}), 0) p(\mathbf{y}_{\mathbb{K}}) d\mathbf{y}_{\mathbb{K}} \right].$$

From the properties of the multivariate Gaussian distribution, see e.g. Anderson (2003),

$$E[X_i | \mathbf{y}_{\mathbb{K}}] = \mu_i + \boldsymbol{\Sigma}_{i\mathbb{K}} (\boldsymbol{\Sigma}_{\mathbb{K}} + \mathbf{T}_{\mathbb{K}})^{-1} (\mathbf{y}_{\mathbb{K}} - \boldsymbol{\mu}_{\mathbb{K}}). \text{ Let us denote } E[X_i | \mathbf{y}_{\mathbb{K}}] \text{ as } W_i.$$

$W_i$  is a linear combination of Gaussian random variables and therefore has marginal distribution

$$p(w_i) = N(\mu_i, s_i^2), \text{ where } s_i^2 = \boldsymbol{\Sigma}_{i\mathbb{K}} (\boldsymbol{\Sigma}_{\mathbb{K}} + \mathbf{T}_{\mathbb{K}})^{-1} \boldsymbol{\Sigma}_{\mathbb{K}i}.$$

This linear combination is the uni-variate variable of interest in the multi-dimensional integral required for the value of information computation. Marginalizing out the remaining dimensions of information, the

value with information  $\mathbf{Y}_{\mathbb{K}}$  can be simplified to: 
$$\sum_{i=1}^N \left[ \int_{w_i} \max(w_i, 0) p(w_i) dw_i \right] = \sum_{i=1}^N E[\max\{W_i, 0\}].$$

The following result is from Schlaiffer (1959) and Bickel (2008):

For a Gaussian variable  $W$  with mean  $m$  and variance  $s^2$ ,  $E[\max\{W, 0\}] = m\Phi(m/s) + s\phi(m/s)$ .

Using this result and subtracting the prior value from the value with information:

$$\begin{aligned} \text{VOI}(\mathbf{Y}_{\mathbb{K}}) &= \sum_{i=1}^N \left[ \mu_i \Phi\left(\frac{\mu_i}{s_i}\right) + s_i \phi\left(\frac{\mu_i}{s_i}\right) \right] - \sum_{i \in \mathbb{P}} \mu_i \\ &= \sum_{i \in \mathbb{P}} \left[ \mu_i \left( \Phi\left(\frac{\mu_i}{s_i}\right) - 1 \right) + s_i \phi\left(\frac{\mu_i}{s_i}\right) \right] + \sum_{i \in \mathbb{P}} \left[ \mu_i \Phi\left(\frac{\mu_i}{s_i}\right) + s_i \phi\left(\frac{\mu_i}{s_i}\right) \right]. \end{aligned}$$

Since  $1 - \Phi\left(\frac{\mu_i}{\sigma_i}\right) = \Phi\left(-\frac{\mu_i}{\sigma_i}\right)$ , we get the required result. □

### Proof of Corollary 1:

For TVOI, there is information regarding all projects, therefore  $\mathbb{K} = \mathbb{N}$ .

The result follows by substituting  $\Sigma_{\mathbb{K}} = \Sigma$  and  $\mathbf{T}_{\mathbb{K}} = \mathbf{T}$ , and recognizing that  $s_i^2 = e_i^T \Sigma (\Sigma + \mathbf{T})^{-1} \Sigma e_i$ . □

### Proof of Theorem 2:

The proof of Theorem 1 shows that the  $\text{VOI}(\mathbf{Y}_{\mathbb{K}})$  can be written as:

$$\text{VOI}(\mathbf{Y}_{\mathbb{K}}) = \sum_{i=1}^N \left[ \mu_i \Phi\left(\frac{\mu_i}{s_i}\right) + s_i \phi\left(\frac{\mu_i}{s_i}\right) \right] - \sum_{i \in \mathbb{P}} \mu_i.$$

Consider again a Gaussian variable  $W$  with mean  $m$  and variance  $s^2$ . We will find partial derivatives of the expression  $m\Phi(m/s) + s\phi(m/s)$  with respect to any parameter  $\theta$ .

$$\frac{d \left[ m\Phi\left(\frac{m}{s}\right) + s\phi\left(\frac{m}{s}\right) \right]}{d\theta} = \frac{dm}{d\theta} \Phi\left(\frac{m}{s}\right) + m \frac{d\Phi\left(\frac{m}{s}\right)}{dm/s} \frac{dm/s}{d\theta} + \frac{ds}{d\theta} \phi\left(\frac{m}{s}\right) + s \frac{d\phi\left(\frac{m}{s}\right)}{dm/s} \frac{dm/s}{d\theta}.$$

Since  $\frac{d\Phi(x)}{dx} = \phi(x)$  and  $\frac{d\phi(x)}{dx} = \frac{d}{dx} \frac{1}{\sqrt{2\pi}} \exp\left(-\frac{x^2}{2}\right) = -x \frac{1}{\sqrt{2\pi}} \exp\left(-\frac{x^2}{2}\right) = -x\phi(x)$ ,

the derivative simplifies to:

$$\begin{aligned} \frac{d \left[ m\Phi\left(\frac{m}{s}\right) + s\phi\left(\frac{m}{s}\right) \right]}{d\theta} &= \frac{dm}{d\theta} \Phi\left(\frac{m}{s}\right) + m\phi\left(\frac{m}{s}\right) \frac{dm/s}{d\theta} + \frac{ds}{d\theta} \phi\left(\frac{m}{s}\right) - s\left(\frac{m}{s}\right) \phi\left(\frac{m}{s}\right) \frac{dm/s}{d\theta} \\ &= \frac{dm}{d\theta} \Phi\left(\frac{m}{s}\right) + \frac{ds}{d\theta} \phi\left(\frac{m}{s}\right) \end{aligned}$$

- Sensitivity to the mean: If  $\theta = m$ ,  $\frac{d \left[ m\Phi\left(\frac{m}{s}\right) + s\phi\left(\frac{m}{s}\right) \right]}{dm} = \Phi\left(\frac{m}{s}\right)$ .

- Sensitivity to the standard deviation: If  $\theta = s$ ,  $\frac{d \left[ m\Phi\left(\frac{m}{s}\right) + s\phi\left(\frac{m}{s}\right) \right]}{ds} = \phi\left(\frac{m}{s}\right)$ .

**(i) Sensitivity to  $\mu_i$ :**

From the result above (sensitivity to the mean), the derivative with respect to the mean of any project is:

$$\frac{d\text{VOI}(\mathbf{Y}_{\mathbb{K}})}{d\mu_i} = \frac{d \left[ \sum_{i=1}^N \left[ \mu_i \Phi\left(\frac{\mu_i}{s_i}\right) + s_i \phi\left(\frac{\mu_i}{s_i}\right) \right] - \sum_{i \in \mathbb{P}} \mu_i \right]}{d\mu_i} = \left\{ \begin{array}{ll} \Phi\left(\frac{\mu_i}{s_i}\right) - 1, & i \in \mathbb{P}, \quad \mu_i > 0 \\ \Phi\left(\frac{\mu_i}{s_i}\right) & i \notin \mathbb{P} \quad \mu_i \leq 0 \end{array} \right\}.$$

$\text{VOI}(\mathbf{Y}_{\mathbb{K}})$  is maximum at  $\mu_i = 0$  and decreases as the mean gets further from 0.

**(ii) Sensitivity to  $\tau_i$ :**

The measurement noise  $\tau_i$  affects the equivalent standard deviations  $s_i$  but does not affect any mean

parameter  $\mu_i$ . For a parameter  $\theta$  that only affects the equivalent standard deviations,

$$\frac{d\text{VOI}(\mathbf{Y}_{\mathbb{K}})}{d\theta} = \frac{d \left[ \sum_{i=1}^N \left[ \mu_i \Phi \left( \frac{\mu_i}{s_i} \right) + s_i \phi \left( \frac{\mu_i}{s_i} \right) \right] - \sum_{i \in \mathbb{P}} \mu_i \right]}{d\theta} = \sum_{i=1}^N \frac{1}{2s_i} \frac{ds_i^2}{d\theta} \phi \left( \frac{\mu_i}{s_i} \right).$$

For the last step in the computation above, we have used the following result, which we proved before

part (i) (sensitivity to the standard deviation): 
$$\frac{d \left[ \mu_i \Phi \left( \frac{\mu_i}{s_i} \right) + s_i \phi \left( \frac{\mu_i}{s_i} \right) \right]}{ds_i} = \phi \left( \frac{\mu_i}{s_i} \right).$$

For the remainder of the proof, we will compute the derivative of the equivalent variance with respect to

$q$ , i.e.  $\frac{ds_i^2}{d\theta}$ , and then replace it back in the expression  $\sum_{i=1}^N \frac{1}{2s_i} \frac{ds_i^2}{d\theta} \phi \left( \frac{\mu_i}{s_i} \right)$ .

The derivative of the inverse of an invertible matrix  $\mathbf{M}$  is  $\frac{d\mathbf{M}^{-1}}{d\theta} = -\mathbf{M}^{-1} \frac{d\mathbf{M}}{d\theta} \mathbf{M}^{-1}$ , where the matrix

derivative works for every entry of the matrix. Here,  $s_i^2 = \boldsymbol{\Sigma}_{i\mathbb{K}} (\boldsymbol{\Sigma}_{\mathbb{K}} + \mathbf{T}_{\mathbb{K}})^{-1} \boldsymbol{\Sigma}_{\mathbb{K}i}$ , therefore, for some

parameter  $\theta$  in  $\mathbf{T}_{\mathbb{K}}$ , 
$$\frac{ds_i^2}{d\theta} = \frac{d \left( \boldsymbol{\Sigma}_{i\mathbb{K}} (\boldsymbol{\Sigma}_{\mathbb{K}} + \mathbf{T}_{\mathbb{K}})^{-1} \boldsymbol{\Sigma}_{\mathbb{K}i} \right)}{d\theta} = -\boldsymbol{\Sigma}_{i\mathbb{K}} (\boldsymbol{\Sigma}_{\mathbb{K}} + \mathbf{T}_{\mathbb{K}})^{-1} \frac{d\mathbf{T}_{\mathbb{K}}}{d\theta} (\boldsymbol{\Sigma}_{\mathbb{K}} + \mathbf{T}_{\mathbb{K}})^{-1} \boldsymbol{\Sigma}_{\mathbb{K}i}.$$

If  $q = t_i^2$  for  $i \in \mathbb{K}$ , then  $\frac{d\mathbf{T}_{\mathbb{K}}}{d\theta}$  is a matrix of 0s except the  $i^{\text{th}}$  diagonal element, which equals 1.

Matrices  $\boldsymbol{\Sigma}_{\mathbb{K}}$  and  $\boldsymbol{\Sigma}_{\mathbb{K}} + \mathbf{T}_{\mathbb{K}}$  are both symmetric.  $(\boldsymbol{\Sigma}_{\mathbb{K}} + \mathbf{T}_{\mathbb{K}})^{-1}$  is also symmetric since matrix inversion

retains the symmetric property. Thus, by replacing  $\mathbf{b} = (\boldsymbol{\Sigma}_{\mathbb{K}} + \mathbf{T}_{\mathbb{K}})^{-1} \boldsymbol{\Sigma}_{\mathbb{K}} \mathbf{e}_i$ ,  $\frac{ds_i^2}{d\theta} = -\mathbf{b}^T \frac{d\mathbf{T}_{\mathbb{K}}}{d\tau_i^2} \mathbf{b} = -b_i^2 < 0$ .

In summary, we get negative effects and the derivative is:

$$\frac{d\text{VOI}(\mathbf{Y}_{\mathbb{K}})}{d\tau_i^2} = -\sum_i \left[ \frac{1}{2s_i} \phi \left( \frac{\mu_i}{s_i} \right) b_i^2 \right].$$

(iii) Sensitivity to  $\sigma_i$  :

The prior standard deviation  $\sigma_i$  affects the equivalent standard deviations  $s_i$  but does not affect any mean parameter  $\mu_i$ . Similar to (ii), for a parameter  $\theta$  that only affects the equivalent standard deviations,

$$\frac{d\text{VOI}(\mathbf{Y}_{\mathbb{K}})}{d\theta} = \frac{d \left[ \sum_{i=1}^N \left[ \mu_i \Phi \left( \frac{\mu_i}{s_i} \right) + s_i \phi \left( \frac{\mu_i}{s_i} \right) \right] - \sum_{i \in \mathbb{P}} \mu_i \right]}{d\theta} = \sum_{i=1}^N \frac{1}{2s_i} \frac{ds_i^2}{d\theta} \phi \left( \frac{\mu_i}{s_i} \right).$$

Consider first the special case of TVOI. The derivative of  $s_i^2$  is again the crucial part. The following matrix identities hold by the Sherman-Woodbury-Morrison formula, see e.g. Henderson and Searle

$$(1981): (\mathbf{\Sigma} + \mathbf{T})^{-1} = \mathbf{\Sigma}^{-1} - \mathbf{\Sigma}^{-1} (\mathbf{\Sigma}^{-1} + \mathbf{T}^{-1})^{-1} \mathbf{\Sigma}^{-1} \text{ and } (\mathbf{\Sigma}^{-1} + \mathbf{T}^{-1})^{-1} = \mathbf{T} - \mathbf{T} (\mathbf{\Sigma} + \mathbf{T})^{-1} \mathbf{T}.$$

Therefore,  $\mathbf{S} = \mathbf{\Sigma} (\mathbf{\Sigma} + \mathbf{T})^{-1} \mathbf{\Sigma} = \mathbf{\Sigma} - \mathbf{T} + \mathbf{T} (\mathbf{\Sigma} + \mathbf{T})^{-1} \mathbf{T}$ . For the derivative of  $s_i^2$ :

$$\frac{de_i^T (\mathbf{\Sigma} - \mathbf{T} + \mathbf{T} (\mathbf{\Sigma} + \mathbf{T})^{-1} \mathbf{T}) e_i}{d\theta} = e_i^T \frac{d\mathbf{\Sigma}}{d\theta} e_i - e_i^T \mathbf{T} (\mathbf{\Sigma} + \mathbf{T})^{-1} \frac{d\mathbf{\Sigma}}{d\theta} (\mathbf{\Sigma} + \mathbf{T})^{-1} \mathbf{T} e_i.$$

If  $q = S_i^2$ ,  $\frac{d\mathbf{\Sigma}}{d\theta}$  is a matrix which is nonzero only for the elements in row  $i$  and column  $i$ . Defining

$\mathbf{B} = (\mathbf{\Sigma} + \mathbf{T})^{-1} \frac{d\mathbf{\Sigma}}{d\sigma_i^2} (\mathbf{\Sigma} + \mathbf{T})^{-1}$ , which is non-negative definite, the above expression can be written as:

$$\frac{de_i^T (\mathbf{\Sigma} - \mathbf{T} + \mathbf{T} (\mathbf{\Sigma} + \mathbf{T})^{-1} \mathbf{T}) e_i}{d\sigma_i^2} = e_i^T (\mathbf{\Sigma} + \mathbf{T}) \mathbf{B} (\mathbf{\Sigma} + \mathbf{T}) e_i - e_i^T \mathbf{T} \mathbf{B} \mathbf{T} e_i.$$

Since both  $\mathbf{\Sigma}$  and  $\mathbf{T}$  are positive definite, this derivative will be positive, and TVOI increases as a function of the prior uncertainty.

The case with PVOI can be viewed as a special case of total information where some  $t_i$ s go to infinity.

The same proof therefore holds.
